# Supplementary material for: A Multi-Physic Modelling Insight into the Differences between Microwave and Conventional Heating for the Synthesis of TiO2 Nanoparticles
Source: MDPI journal article supplement (doi:10.3390/pr10040697), 2022-04-03

# A multi-physic modelling insight into the differences between microwave and conventional heating for the synthesis of TiO<sub>2</sub> nanoparticles

Giulia Poppi<sup>1</sup>, Elena Colombini<sup>1</sup>, Diego Salvatori<sup>1</sup>, Alessio Balestri<sup>1</sup>, Giovanni Baldi<sup>2</sup>, Cristina Leonelli<sup>1, \*</sup> and Paolo Veronesi<sup>1, \*</sup>

**Table S1:** |S11| parameter [dB] values calculated at the operating frequency of 2.45 [GHz] as function of the radius [mm] of the inner circumference of the hexagonal applicator. Optimized conditions indicated in yellow colour.

| Radius (R)<br>[mm] | S11  [dB] at 2.45 [GHz] |
|--------------------|-------------------------|
| 90                 | -13.27                  |
| 92                 | -13.48                  |
| 94                 | -18.6                   |
| 96                 | -24.09                  |
| 98                 | -16.85                  |
| 100                | -13.23                  |
| 102                | -10.79                  |
| 104                | -10.15                  |
| 106                | -13.034                 |
| 108                | -24.37                  |
| 108.2              | -26.49                  |
| 108.4              | -30.22                  |
| 108.6              | -35.4                   |
| 108.8              | -37.62                  |
| 109                | -35.08                  |
| 109.2              | -30.76                  |
| 109.4              | -27.74                  |
| 109.6              | -25.62                  |
| 109.8              | -23.61                  |
| 110                | -21.69                  |
| 112                | -13.3                   |
| 114                | -9.178                  |
| 116                | -8.305                  |
| 118                | -7.969                  |
| 120                | -9.252                  |

**Figure S1:** Variation of the simulated reflection coefficient  $|S_{11}|$  [dB] with frequency [Hz] in the optimized conditions (inner diameter of the hexagonal applicator: radius=108.8 mm) and measured reflection coefficient.

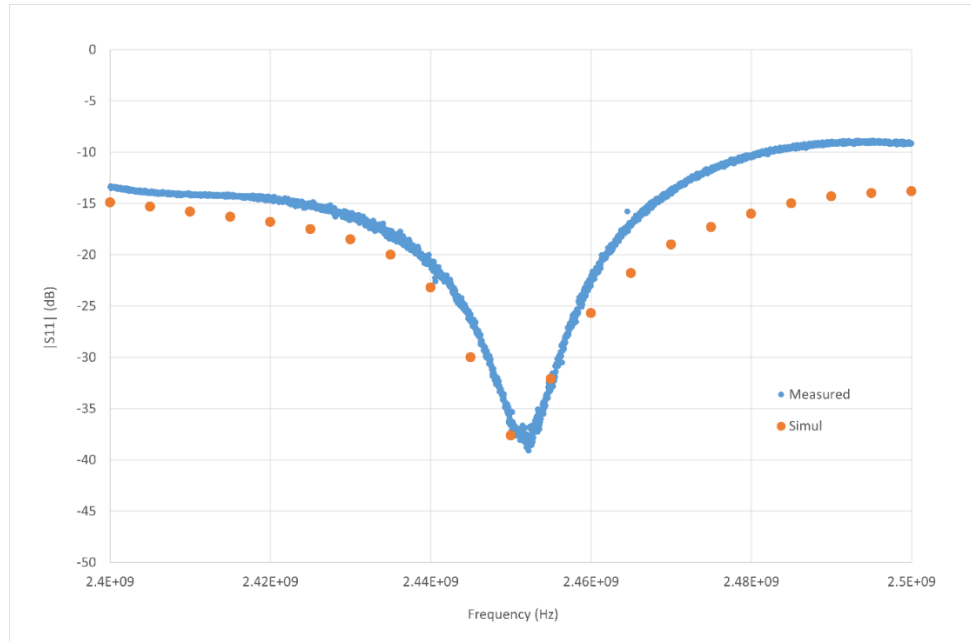

**Table S2:** Temperature Homogeneity Index (THI) as function of the height of the load inside the helix: conventional heating and microwave heating, front of the helix with respect to the waveguide.

| Height of the load<br>inside the helix [mm] | Temperature Homogeneity Index (THI) |                   |
|---------------------------------------------|-------------------------------------|-------------------|
|                                             | Conventional Heating                | Microwave Heating |
| 55                                          | 19.95266                            | 17988.7           |
| 75                                          | 23.05895                            | 55195.28          |
| 95                                          | 25.92137                            | 18528.9           |
| 115                                         | 28.35415                            | 18043.48          |
| 135                                         | 31.30619                            | 17966.66          |
| 155                                         | 35.1676                             | 22177.95          |
| 175                                         | 39.52196                            | 38812.39          |
| 195                                         | 42.89888                            | 29935.27          |
| 215                                         | 47.0405                             | 20911.05          |
| 235                                         | 54.34064                            | 33275.81          |
| 255                                         | 58.96768                            | 13406.27          |
| 275                                         | 65.18053                            | 11040.19          |
| 295                                         | 71.94423                            | 17670.77          |
| 315                                         | 79.48844                            | 29637.81          |
| 335                                         | 89.16447                            | 9235.645          |
| 355                                         | 97.41626                            | 5655.837          |
| 375                                         | 107.1959                            | 5734.938          |
| 395                                         | 118.1722                            | 11406.72          |
| 415                                         | 129.3962                            | 13213.47          |
| 435                                         | 141.5953                            | 34589.1           |

**Table S3:** Temperature Homogeneity Index (THI) as function of the height of the load inside the helix: conventional heating and microwave heating, rear of the helix with respect to the waveguide.

| Height of the load inside the helix [mm] | Temperature Homogeneity Index (THI) |                   |
|------------------------------------------|-------------------------------------|-------------------|
|                                          | Conventional Heating                | Microwave Heating |
| 65                                       | 22.17781                            | 22901.94          |
| 85                                       | 24.23259                            | 11709.38          |
| 105                                      | 26.7195                             | 40981.36          |
| 125                                      | 29.39933                            | 58763.78          |
| 145                                      | 33.32272                            | 81724.79          |
| 165                                      | 37.39                               | 23233.51          |
| 185                                      | 40.97518                            | 11518.78          |
| 205                                      | 44.46606                            | 5546.474          |
| 225                                      | 51.55685                            | 6437.445          |
| 245                                      | 56.5626                             | 8586.807          |
| 265                                      | 62.65331                            | 29369.97          |
| 285                                      | 67.63764                            | 12031.57          |
| 305                                      | 76.87718                            | 8921.481          |
| 325                                      | 83.73064                            | 21277.26          |
| 345                                      | 93.03465                            | 26150.63          |
| 365                                      | 98.8488                             | 11617.03          |
| 385                                      | 113.4809                            | 10547.1           |
| 405                                      | 123.4475                            | 14068.46          |
| 425                                      | 139.4759                            | 8530.886          |
| 445                                      | 150.0994                            | 8713.088          |

**Figure S2:** Average temperatures and heating rates of the load along the applicator height in the rear of the helix with respect to the waveguide, in case of conventional and microwave heating.

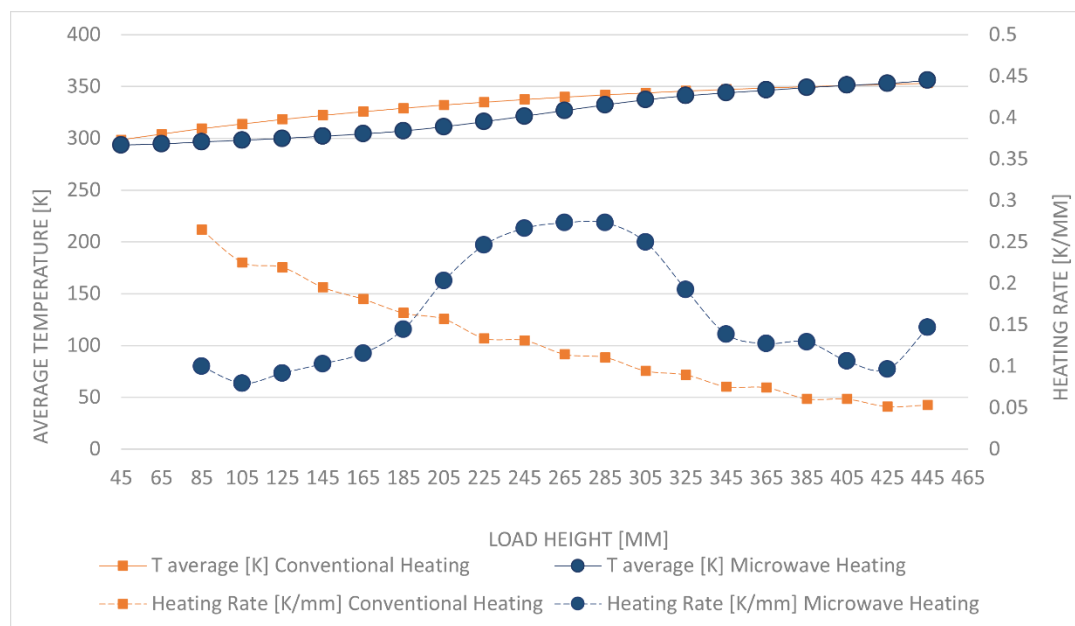

**Table S4:** Values of average temperatures and heating rates of the load along the applicator height in the front of the helix with respect to the waveguide, in case of conventional and microwave heating.

| Load Height [mm] | T average [K]        |                   | Heating Rate [K/mm]  |                   |
|------------------|----------------------|-------------------|----------------------|-------------------|
|                  | Conventional Heating | Microwave Heating | Conventional Heating | Microwave Heating |
| 35               | 301.7430976          | 293.4211452       |                      |                   |
| 55               | 306.7893001          | 295.4420953       | 0.154654879          | 0.001057262       |
| 75               | 311.5830925          | 297.1360993       | 0.252310126          | 0.1010475         |
| 95               | 316.0199402          | 298.8901969       | 0.239689622          | 0.0847002         |
| 115              | 320.2614504          | 300.8393047       | 0.221842381          | 0.087704884       |
| 135              | 324.0227505          | 303.0021903       | 0.212075513          | 0.097455388       |
| 155              | 327.4749148          | 305.5885303       | 0.188065001          | 0.10814428        |
| 175              | 330.664579           | 309.0934          | 0.172608218          | 0.129317          |
| 195              | 333.6488746          | 313.6609812       | 0.159483208          | 0.175243484       |
| 215              | 336.2283976          | 318.788614        | 0.149214783          | 0.22837906        |
| 235              | 338.7646095          | 324.1144588       | 0.128976145          | 0.256381639       |
| 255              | 340.9791394          | 329.5094531       | 0.126810596          | 0.266292242       |
| 275              | 343.0497516          | 334.7700179       | 0.110726495          | 0.269749712       |
| 295              | 344.8997912          | 339.2212411       | 0.103530611          | 0.263028241       |
| 315              | 346.4671509          | 342.5297275       | 0.092501979          | 0.222561159       |
| 335              | 347.9793519          | 345.1767801       | 0.078367988          | 0.16542432        |
| 355              | 349.3204934          | 347.7784363       | 0.075610047          | 0.132352633       |
| 375              | 350.5784345          | 350.2274205       | 0.067057075          | 0.130082808       |
| 395              | 351.6984537          | 352.193952        | 0.062897057          | 0.12244921        |
| 415              | 352.7732201          | 354.53681         | 0.056000959          | 0.098326577       |
| 435              | 301.7430976          | 293.4211452       | 0.053738317          | 0.117142897       |

**Table S5:** Values of average temperatures and heating rates of the load along the applicator height in the rear of the helix with respect to the waveguide, in case of conventional and microwave heating.

| Load Height [mm] | T average [K]        |                   | Heating Rate [K/mm]  |                   |
|------------------|----------------------|-------------------|----------------------|-------------------|
|                  | Conventional Heating | Microwave Heating | Conventional Heating | Microwave Heating |
| 45               | 298.65               | 293.40            |                      |                   |
| 65               | 304.1031985          | 294.3874226       | 0.272659924          | 0.049371132       |
| 85               | 309.3978835          | 296.3846628       | 0.264734251          | 0.099862009       |
| 105              | 313.9064623          | 297.9694161       | 0.22542894           | 0.079237664       |
| 125              | 318.294207           | 299.8015621       | 0.219387235          | 0.091607303       |
| 145              | 322.198117           | 301.8595234       | 0.195195502          | 0.102898062       |
| 165              | 325.8201102          | 304.171955        | 0.181099658          | 0.115621578       |
| 185              | 329.1058359          | 307.0643433       | 0.164286287          | 0.144619415       |
| 205              | 332.2473516          | 311.1257003       | 0.157075782          | 0.203067853       |
| 225              | 334.9238676          | 316.0526281       | 0.1338258            | 0.246346389       |
| 245              | 337.551604           | 321.3830567       | 0.131386819          | 0.266521429       |
| 265              | 339.8406739          | 326.8484426       | 0.114453497          | 0.273269294       |
| 285              | 342.0565458          | 332.3086114       | 0.110793596          | 0.273008444       |
| 305              | 343.9458149          | 337.3034162       | 0.094463454          | 0.249740236       |
| 325              | 345.7412046          | 341.1529025       | 0.089769482          | 0.192474318       |
| 345              | 347.2525001          | 343.9258286       | 0.075564775          | 0.138646307       |
| 365              | 348.7387829          | 346.4706925       | 0.07431414           | 0.127243192       |
| 385              | 349.9541396          | 349.0582913       | 0.060767838          | 0.129379942       |
| 405              | 351.1638148          | 351.1791544       | 0.060483761          | 0.106043152       |
| 425              | 352.1938802          | 353.109087        | 0.051503267          | 0.096496635       |
| 445              | 353.2636814          | 356.0408486       | 0.053490062          | 0.146588078       |

**Figure S3:** Electric field strength in the applicator, slice plot, showing the higher electric field strength in the central regions of the applicator.

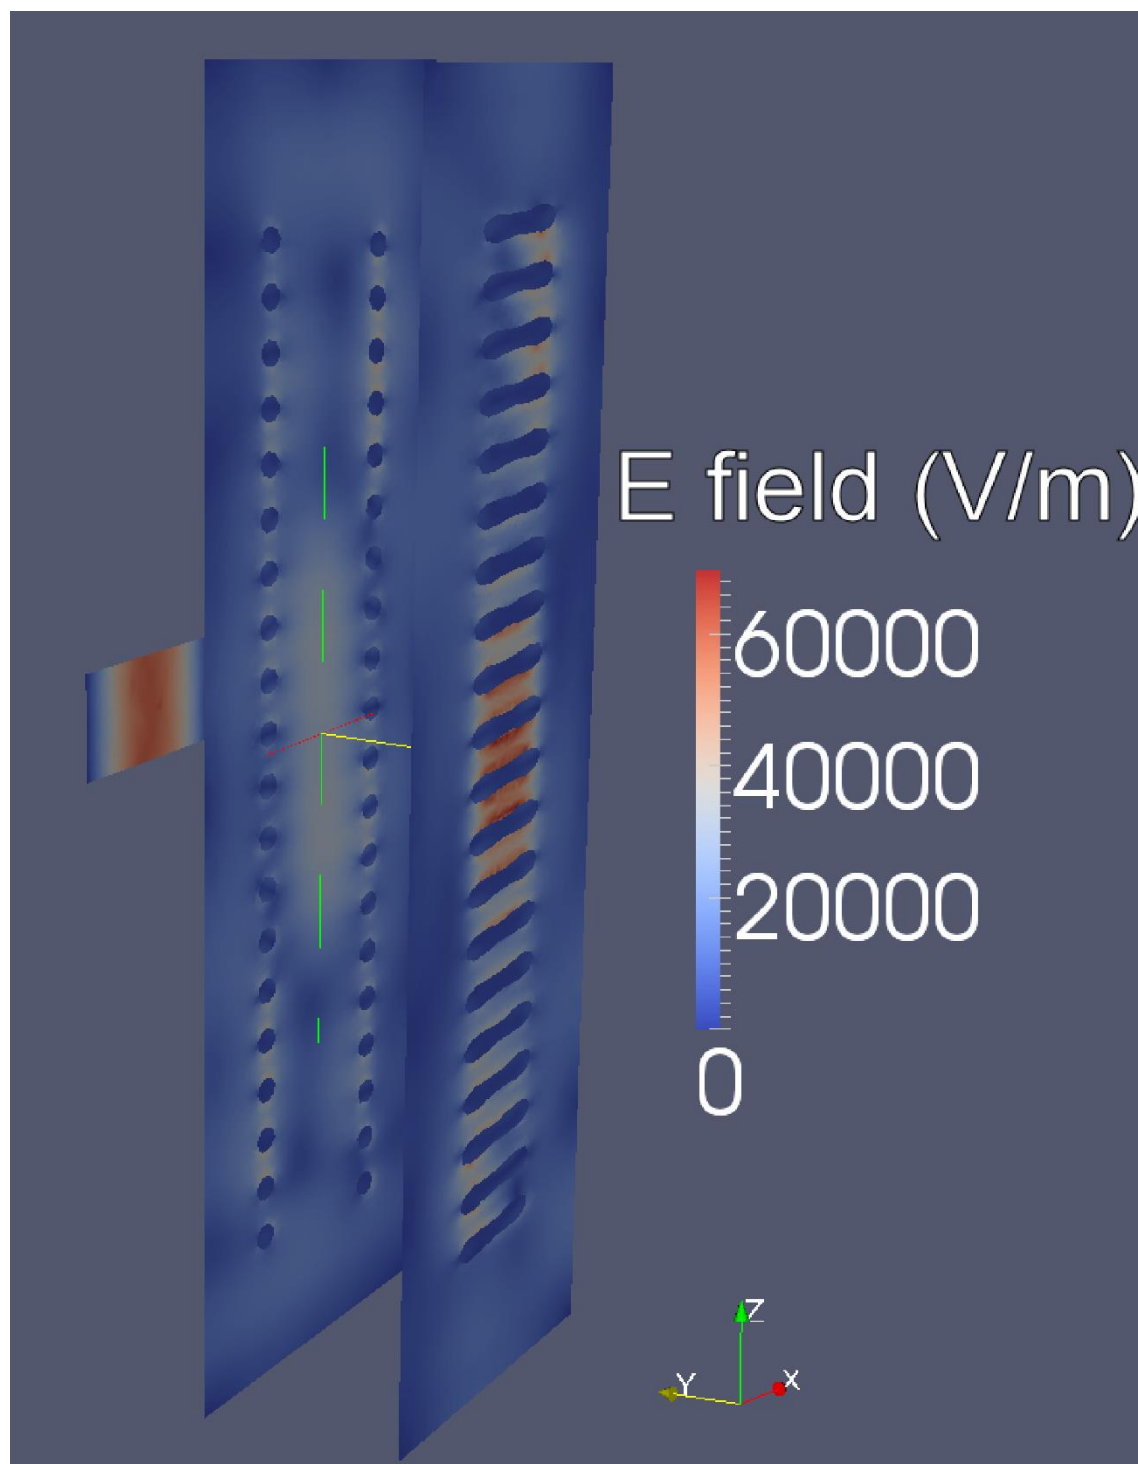

Supplement: s1 [file s1]
